# Supplementary material
Source: PubMed Central journal article supplement (PMC6706810)
Supplement: bloodBLD2019001144-suppl1.pdf [file bloodBLD2019001144-suppl1.pdf]

Taylor et al., Supplementary Materials

Supplementary Tables

Supplementary Table 1. Year of diagnosis of included patients

| Year of Diagnosis | Frequency | Percent | Cumulative Frequency | Cumulative Percent |
|-------------------|-----------|---------|----------------------|--------------------|
| 2000              | 1         | 1.69    | 1                    | 1.69               |
| 2002              | 2         | 3.39    | 3                    | 5.08               |
| 2003              | 1         | 1.69    | 4                    | 6.78               |
| 2005              | 2         | 3.39    | 6                    | 10.17              |
| 2006              | 1         | 1.69    | 7                    | 11.86              |
| 2007              | 1         | 1.69    | 8                    | 13.56              |
| 2008              | 2         | 3.39    | 10                   | 16.95              |
| 2009              | 5         | 8.47    | 15                   | 25.42              |
| 2010              | 7         | 11.86   | 22                   | 37.29              |
| 2011              | 8         | 13.56   | 30                   | 50.85              |
| 2012              | 10        | 16.95   | 40                   | 67.80              |
| 2013              | 4         | 6.78    | 44                   | 74.58              |
| 2014              | 6         | 10.17   | 50                   | 84.75              |
| 2015              | 7         | 11.86   | 57                   | 96.61              |
| 2016              | 2         | 3.39    | 59                   | 100.00             |

**Supplementary Table 2. Abnormal karyotypes observed**

| Karyotype                                                                                                                                                                                                                                                                             |
|---------------------------------------------------------------------------------------------------------------------------------------------------------------------------------------------------------------------------------------------------------------------------------------|
| 44,XY, del(7q23) [9]/ 46,XY [11]                                                                                                                                                                                                                                                      |
| 42,XX, -3,-7,-7,-9,-10,add(12)(p11.2),-13,-15,add(16)(q23),-21, +4mar [2]/ 46,XX [18]                                                                                                                                                                                                 |
| 45,X, -Y [13]/ 46,XY [7]                                                                                                                                                                                                                                                              |
| 46,XY, +1, der(1;6)(q10;q10), t(11;16)(q13;p13)/ 46, idem, add(14)(p11.2)                                                                                                                                                                                                             |
| 45,XY, -1,del(5)(q31q35),-7, del(10)(q24),der(12)t(1;12)(q12;q21), +mar[cp3]/46,XY [17].nuc ish(EGR1x1,D5S723/D5S721x2) [16/100]                                                                                                                                                      |
| 45,XY, i(7)(q10),del(12)(p12),-15 [7]/ 46,XY [13]                                                                                                                                                                                                                                     |
| 47,XY, del(9), (q13q22), +16 [13]/ 46,XY [7]                                                                                                                                                                                                                                          |
| 49,XY, +1,+12,+21 [3]/ 46,XY [17]                                                                                                                                                                                                                                                     |
| 46~47,XY, -4, der(7), t(7;12),(p22;q12), -9, -12, -13, +16, add(17)(q24), +20, -21, +1~3mar [23/25]                                                                                                                                                                                   |
| 46,XY, del(9)(q21) in 8/11 metaphases                                                                                                                                                                                                                                                 |
| 43-44,XY, del(5)(q13q33),inv(6)(p11q23),-9,add(11)((p15),-12, der(21)(t(12;21)(q13;p11.1),-22,+mar[cp7]/ 45-46,XY, del(5)(q13q33),inv(6)(p11q23),add(8)(q24),-12, der(13)(t(12;13)(q24.1;q34),der(17;21)(q10;q10),del(22)(q11.2), +2-3 mar[cp10].ish 8q24(5'MYCx2,3'MYCx1)/ 46,XY [3] |
| 42,XX, -3,-7,-7,-9,-10,add(12)(p11.2),-13,-15,add(16)(q23),-21,+4mar [2]/ 46,XX [18]                                                                                                                                                                                                  |
| 6 abnormal metaphases involving chromosome 1, 3p, 4q, 9q. Loss of chromosome 5, 6, 13, and 2-3 marker chromosomes were seen.                                                                                                                                                          |

**Supplementary Table 3. Flow/IHC markers by organ involvement at diagnosis**

|       |          | Total   | Skin Only | Systemic Only<br>w/o Skin | Skin and<br>Systemic | Incomplete<br>Staging |
|-------|----------|---------|-----------|---------------------------|----------------------|-----------------------|
| N     |          | 59      | 11        | 10                        | 28                   | 10                    |
| CD123 | positive | 46 (78) | 7 (64)    | 10 (100)                  | 21 (75)              | 8 (80)                |
|       | negative | 0 (0)   | 0 (0)     | 0 (0)                     | 0 (0)                | 0 (0)                 |
|       | unknown  | 13 (22) | 4 (36)    | 0 (0)                     | 7 (25)               | 2 (20)                |
| CD56  | positive | 57 (97) | 11 (100)  | 9 (90)                    | 27 (96)              | 10 (100)              |
|       | negative | 2 (3)   | 0 (0)     | 1 (10)                    | 1 (4)                | 0 (0)                 |
|       | unknown  | 0 (0)   | 0 (0)     | 0 (0)                     | 0 (0)                | 0 (0)                 |
| CD4   | positive | 56 (95) | 10 (91)   | 10 (100)                  | 26 (93)              | 10 (100)              |
|       | negative | 3 (5)   | 1 (9)     | 0 (0)                     | 2 (7)                | 0 (0)                 |
|       | unknown  | 0 (0)   | 0 (0)     | 0 (0)                     | 0 (0)                | 0 (0)                 |
| TCL1  | positive | 10 (17) | 4 (36)    | 2 (20)                    | 4 (14)               | 0 (0)                 |
|       | negative | 11 (19) | 0 (0)     | 2 (20)                    | 7 (25)               | 2 (20)                |
|       | unknown  | 38 (64) | 7 (64)    | 6 (60)                    | 17 (61)              | 8 (80)                |
| TdT   | positive | 20 (57) | 6 (55)    | 3 (30)                    | 9 (32)               | 2 (20)                |
|       | negative | 14 (40) | 2 (18)    | 4 (40)                    | 4 (14)               | 4 (40)                |
|       | unknown  | 25 (42) | 3 (27)    | 3 (30)                    | 15 (54)              | 4 (40)                |
| CD7   | positive | 19 (63) | 2 (18)    | 6 (60)                    | 10 (36)              | 1 (10)                |
|       | negative | 11 (37) | 1 (9)     | 4 (40)                    | 3 (11)               | 3 (30)                |
|       | unknown  | 29 (49) | 8 (73)    | 0 (0)                     | 15 (54)              | 6 (60)                |
| CD3   | positive | 10 (17) | 2 (18)    | 2 (20)                    | 6 (21)               | 0 (0)                 |
|       | negative | 45 (76) | 8 (73)    | 8 (80)                    | 20 (71)              | 9 (90)                |
|       | unknown  | 4 (7)   | 1 (9)     | 0 (0)                     | 2 (7)                | 1 (10)                |

**Supplementary Table 4. List of first-line therapies**

| <b>Treatment</b>                    | <b>Intensity</b> | <b>Frequency</b> | <b>Percent</b> |
|-------------------------------------|------------------|------------------|----------------|
| 6-MP then CHOP                      | Moderate         | 1                | 2.27           |
| 7+3                                 | Intensive        | 4                | 9.10           |
| AG-221 (Enasidenib)                 | Non-intensive    | 1                | 2.27           |
| CALGB 9111                          | Intensive        | 4                | 9.10           |
| CHOP                                | Moderate         | 1                | 2.27           |
| CHOEP                               | Moderate         | 1                | 2.27           |
| Campath (alemtuzumab)               | Non-intensive    | 1                | 2.27           |
| Decitabine                          | Non-intensive    | 1                | 2.27           |
| Doxorubicin/Gemcitabine/Vinorelbine | Moderate         | 1                | 2.27           |
| EPOCH                               | Intensive        | 2                | 4.55           |
| Gemcitabine/Vinorelbine             | Moderate         | 1                | 2.27           |
| HIDAC/Mitoxantrone/methotrexate     | Intensive        | 2                | 4.55           |
| HyperCVAD                           | Intensive        | 7                | 15.91          |
| ICE                                 | Moderate         | 5                | 11.36          |
| IVAC                                | Intensive        | 1                | 2.27           |
| Modified hyperCVAD                  | Intensive        | 1                | 2.27           |
| NY II Peds ALL Regimen              | Intensive        | 1                | 2.27           |
| Pralatrexate                        | Non-intensive    | 3                | 6.82           |
| Prednisone/Hydroxyurea              | Non-intensive    | 1                | 2.27           |
| RCHOP                               | Moderate         | 1                | 2.27           |
| SMILE                               | Intensive        | 1                | 2.27           |
| SWOG 1203                           | Intensive        | 1                | 2.27           |
| Vincristine/Prednisone              | Non-intensive    | 1                | 2.27           |
| XRT                                 | Non-intensive    | 1                | 2.27           |

6-MP= 6-mercaptopurine; CHOP = cyclophosphamide, doxorubicin, vincristine, prednisolone; 7+3 = cytarabine, daunorubicin (or idarubicin); CALGB 9111 = Induction cyclophosphamide, daunorubicin, vincristine, prednisolone, asparaginase and filgrastim; CHOEP = cyclophosphamide, doxorubicin, vincristine, etoposide, prednisolone; EPOCH = dose-adjusted etoposide, cyclophosphamide, doxorubicin, vincristine, prednisolone; HIDAC = high dose cytarabine; hyperCVAD = cyclophosphamide, doxorubicin, vincristine, dexamethasone, cytarabine, methotrexate; ICE = ifosfamide, carboplatin, etoposide; IVAC = ifosfamide, etoposide, cytarabine, methotrexate; NY II Peds ALL regimen = pediatric-inspired ALL regimen; RCHOP = rituximab, cyclophosphamide, doxorubicin, vincristine, prednisolone; SMILE = dexamethasone, methotrexate, ifosfamide, asparaginase, etoposide; SWOG 1203 = 7+3 with or without vorinostat; XRT = radiation therapy.

**Supplementary Figures**

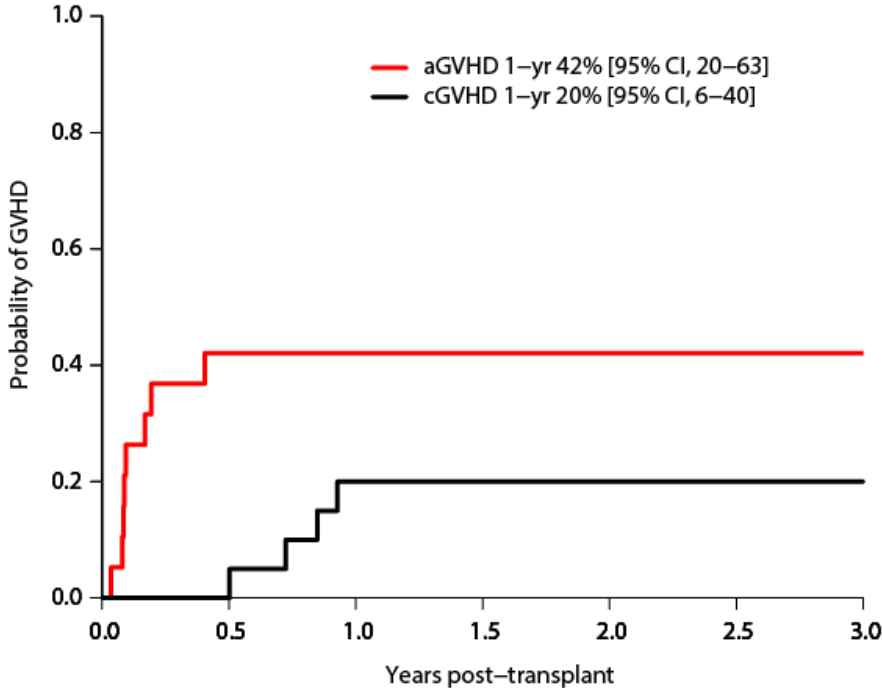

**Supplementary Figure 1. GVHD after hematopoietic stem cell transplant for BPDCN.** Cumulative Incidence of acute and chronic GVHD post-transplant with death as a competing risk for the 20 patients who received an allogeneic transplant.

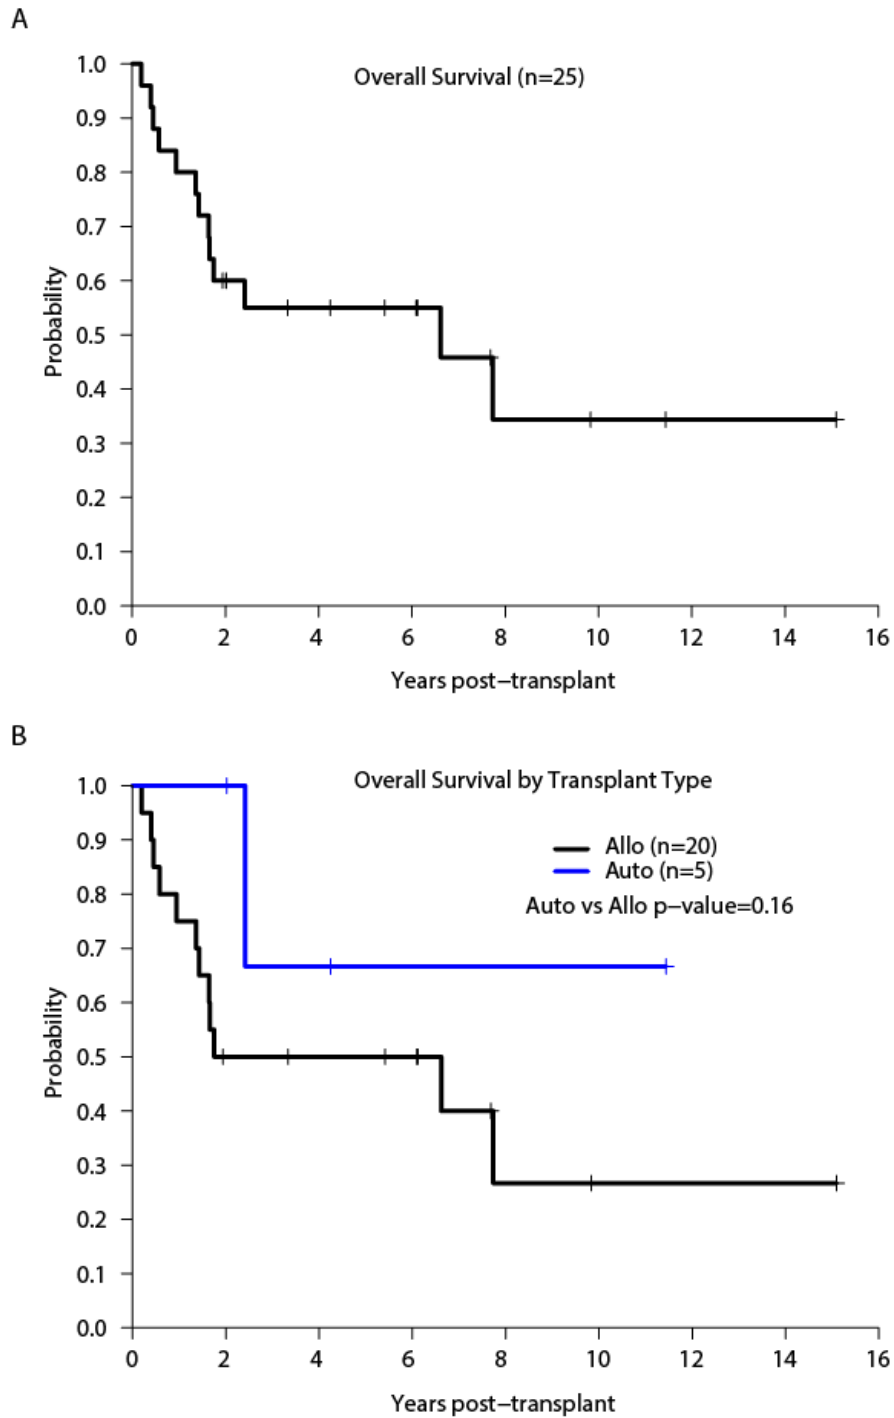

**Supplementary Figure 2. Overall survival after hematopoietic stem cell transplant for BPDCN. (A) Overall survival from time of transplant. (B) Overall survival from time of transplant by type of transplant, autologous versus allogeneic.**
